# Supplementary material for: A self-oscillating gel system with complex dynamic behavior based on a time delay between the oscillations
Source: Royal Society of Chemistry journal article supplement (doi:10.1039/d1sm01635k), 2021-12-13
Supplement: d1sm01635k1.pdf [file d1sm01635k1.pdf]

## Electronic Supplementary Information

# **A self-oscillating gel system with complex dynamic behavior based on a time delay between the oscillations**

Xiuchen Li,<sup>ab</sup> Jie Li,<sup>c</sup> Zhaohui Zheng,<sup>a</sup> Jinni Deng,<sup>ad</sup> Yi Pan <sup>\*a</sup> and Xiaobin Ding <sup>\*a</sup>

*<sup>a</sup>Chengdu Institute of Organic Chemistry, Chinese Academy of Science, Chengdu 610041, China*

*E-mail: [xbding@cioc.ac.cn](mailto:xbding@cioc.ac.cn), [zhzheng@cioc.ac.cn](mailto:zhzheng@cioc.ac.cn); Fax: +86 28 85233426; Tel: +8628 8523342*

*<sup>b</sup>University of the Chinese Academy of Science (CAS), Beijing 100049, China*

*<sup>c</sup>Sichuan Normal University, Chengdu, 610000, China*

*<sup>d</sup>School of Science, Xihua University, Chengdu, 610039, China*

## 1. Materials

N-Isopropylacrylamide (NIPAAm), N-3-(Aminopropyl) methacrylamide (NAPMAM), Ruthenium (III) chloride hydrate ( $\text{RuCl}_3 \cdot 3\text{H}_2\text{O}$ , 99 %), 4,4'-dimethyl-2,2'-dipyridyl, 2,2'-bipyridine, lithium chloride (LiCl), 1,4-Dioxane, Sodium Pyrosulfite ( $\text{Na}_2\text{S}_2\text{O}_5$ ), N,N'-Dicyclohexylcarbodiimide (DCC), 2,5-Pyrrolidinedione, tetramethylenediamine (TEMED), ammonium persulfate (APS), sodium carbonate ( $\text{Na}_2\text{CO}_3$ ), sodium bromate ( $\text{NaBrO}_3$ ) and malonic acid (MA) were purchased from Aladdin Bio-Chem Technology Co., Ltd (Shanghai, China). Selenium dioxide ( $\text{SeO}_2$ ), N, N'-Methylenebisacrylamide (MBAAM) was purchased from Macklin Biochemical Co., Ltd (Shanghai, China). Dimethyl sulfoxide (DMSO),  $\text{HNO}_3$  aqueous solution was purchased from Kelong Chemicals (Chengdu, China). Ethyl acetate ( $\text{C}_4\text{H}_8\text{O}_2$ ), petroleum ether, dichloromethane ( $\text{CH}_2\text{Cl}_2$ ), ethanol ( $\text{C}_2\text{H}_6\text{O}$ ), NaOH, hydrochloric acid (HCl), acetic Acid ( $\text{CH}_3\text{COOH}$ ), Acetonitrile ( $\text{CH}_3\text{CN}$ ), Dimethyl formamide (DMF), Iso-Propyl alcohol and acetone ( $\text{CH}_3\text{COCH}_3$ ) were purchased from Guanghua Sci-Tech Co., Ltd (Guangdong, China). Ammonium hexafluorophosphate ( $\text{NH}_4[\text{PF}_6]$ ) and hexafluoro phosphoric acid (HPF<sub>6</sub> in water, 60%) were purchased from Meryer Sci-Tech Co., Ltd (Shanghai, China).

## 2. Synthesis of Bis(2,2'-bipyridine) (1-(4'-methyl-2,2'-bipyridine-4-carboxyloxy)-2,5-pyrrolidinedione) ruthenium (II) bis(hexafluorophosphate) (Abbreviated as $\text{Ru}(\text{bpy})_3\text{-NHS}$ )

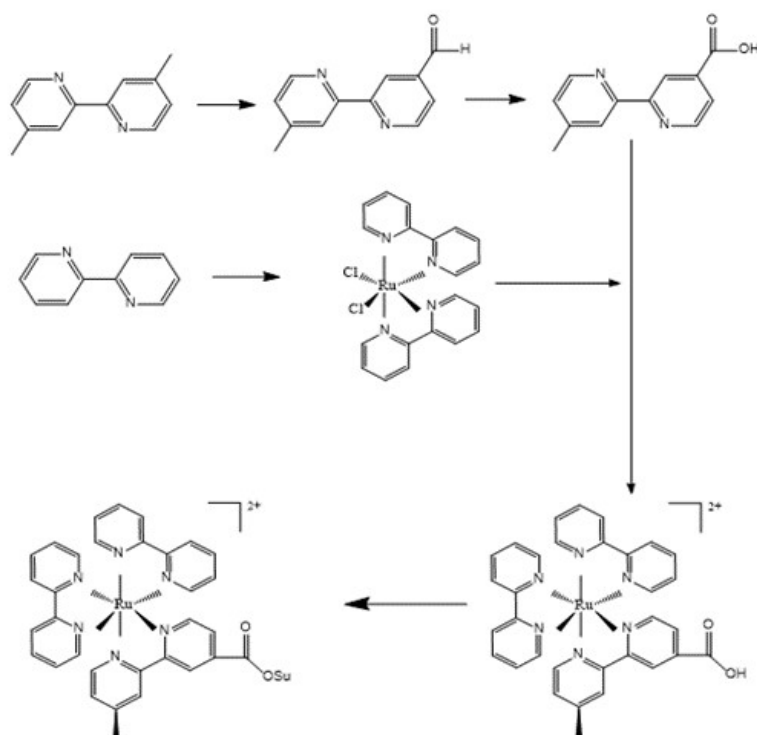

It was synthesized according to previous report. [1]

## 3. Preparation of poly (NIPAAm-co-NAPMAM-co- $\text{Ru}(\text{bpy})_3\text{NAPMAM}$ ) gel

NIPAAm, NAPMAM, MBAAM, and TEMED were dissolved in distilled water. (Table.1) After the pre-gel solution was cooled in iced water under a nitrogen

atmosphere for 30 min, the initiator APS was added. Then the pre-gel solution was injected into the mould (Fig.1a) and radical copolymerization was conducted at 4°C. After gelation, the prepared gels were thoroughly washed with distilled water to remove unreacted monomers for two days. The gels were immersed in DMSO to exchange solvent. After that, the gels were immersed in DMSO solution of 70 mM Ru(bpy)<sub>3</sub>-NHS containing triethylamine for 24 h in the mould (Fig.1b) to conjugate Ru(bpy)<sub>3</sub> to amino group of the gels. Then, the gels were thoroughly washed with DMSO to remove unreacted reagents. Prepared gels were preserved in distilled water.

Table1. Structural profiles of the SOGs

|                     | G1   | G2   | G3   | G4   | G5   | G6   |
|---------------------|------|------|------|------|------|------|
| NIPAAm/mg           | 113  | 113  | 113  | 113  | 113  | 113  |
| NAPMAm/mg           | 17   | 17   | 17   | 17   | 17   | 17   |
| MBAAm/mg            | 1.70 | 1.36 | 1.02 | 0.68 | 2.04 | 2.38 |
| TEMED/mg            | 3.1  | 3.1  | 3.1  | 3.1  | 3.1  | 3.1  |
| APS/mg              | 1.25 | 1.25 | 1.25 | 1.25 | 1.25 | 1.25 |
| H <sub>2</sub> O/ml | 1    | 1    | 1    | 1    | 1    | 1    |

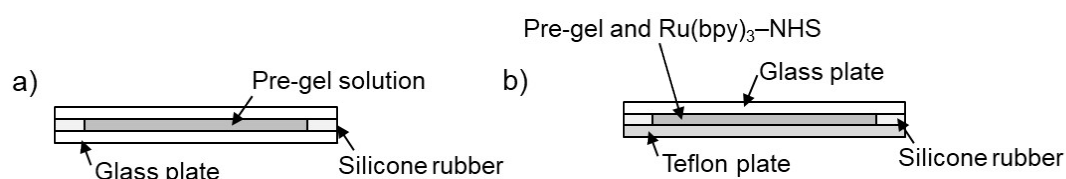

Fig.1 Preparation of the (NIPAAm-co-NAPMAm-co-Ru(bpy)<sub>3</sub>NAPMAm) gel undergoing anisotropic contraction.

## References

- [1] B. M. Peek, G. T. Ross, S. W. Edwards, G. J. Meyer, T. J. Meyer and B. W. Erickson, *Int. J. Protein Res.*, 1991, **38**, 114
